# Supplementary material for: Circadian Clock Genes Act as Diagnostic and Prognostic Biomarkers of Glioma: Clinic Implications for Chronotherapy
Source: Hindawi journal article supplement (doi:10.1155/2022/9774879), 2022-01-01
Supplement: f1 [file 9774879.f1.pdf]

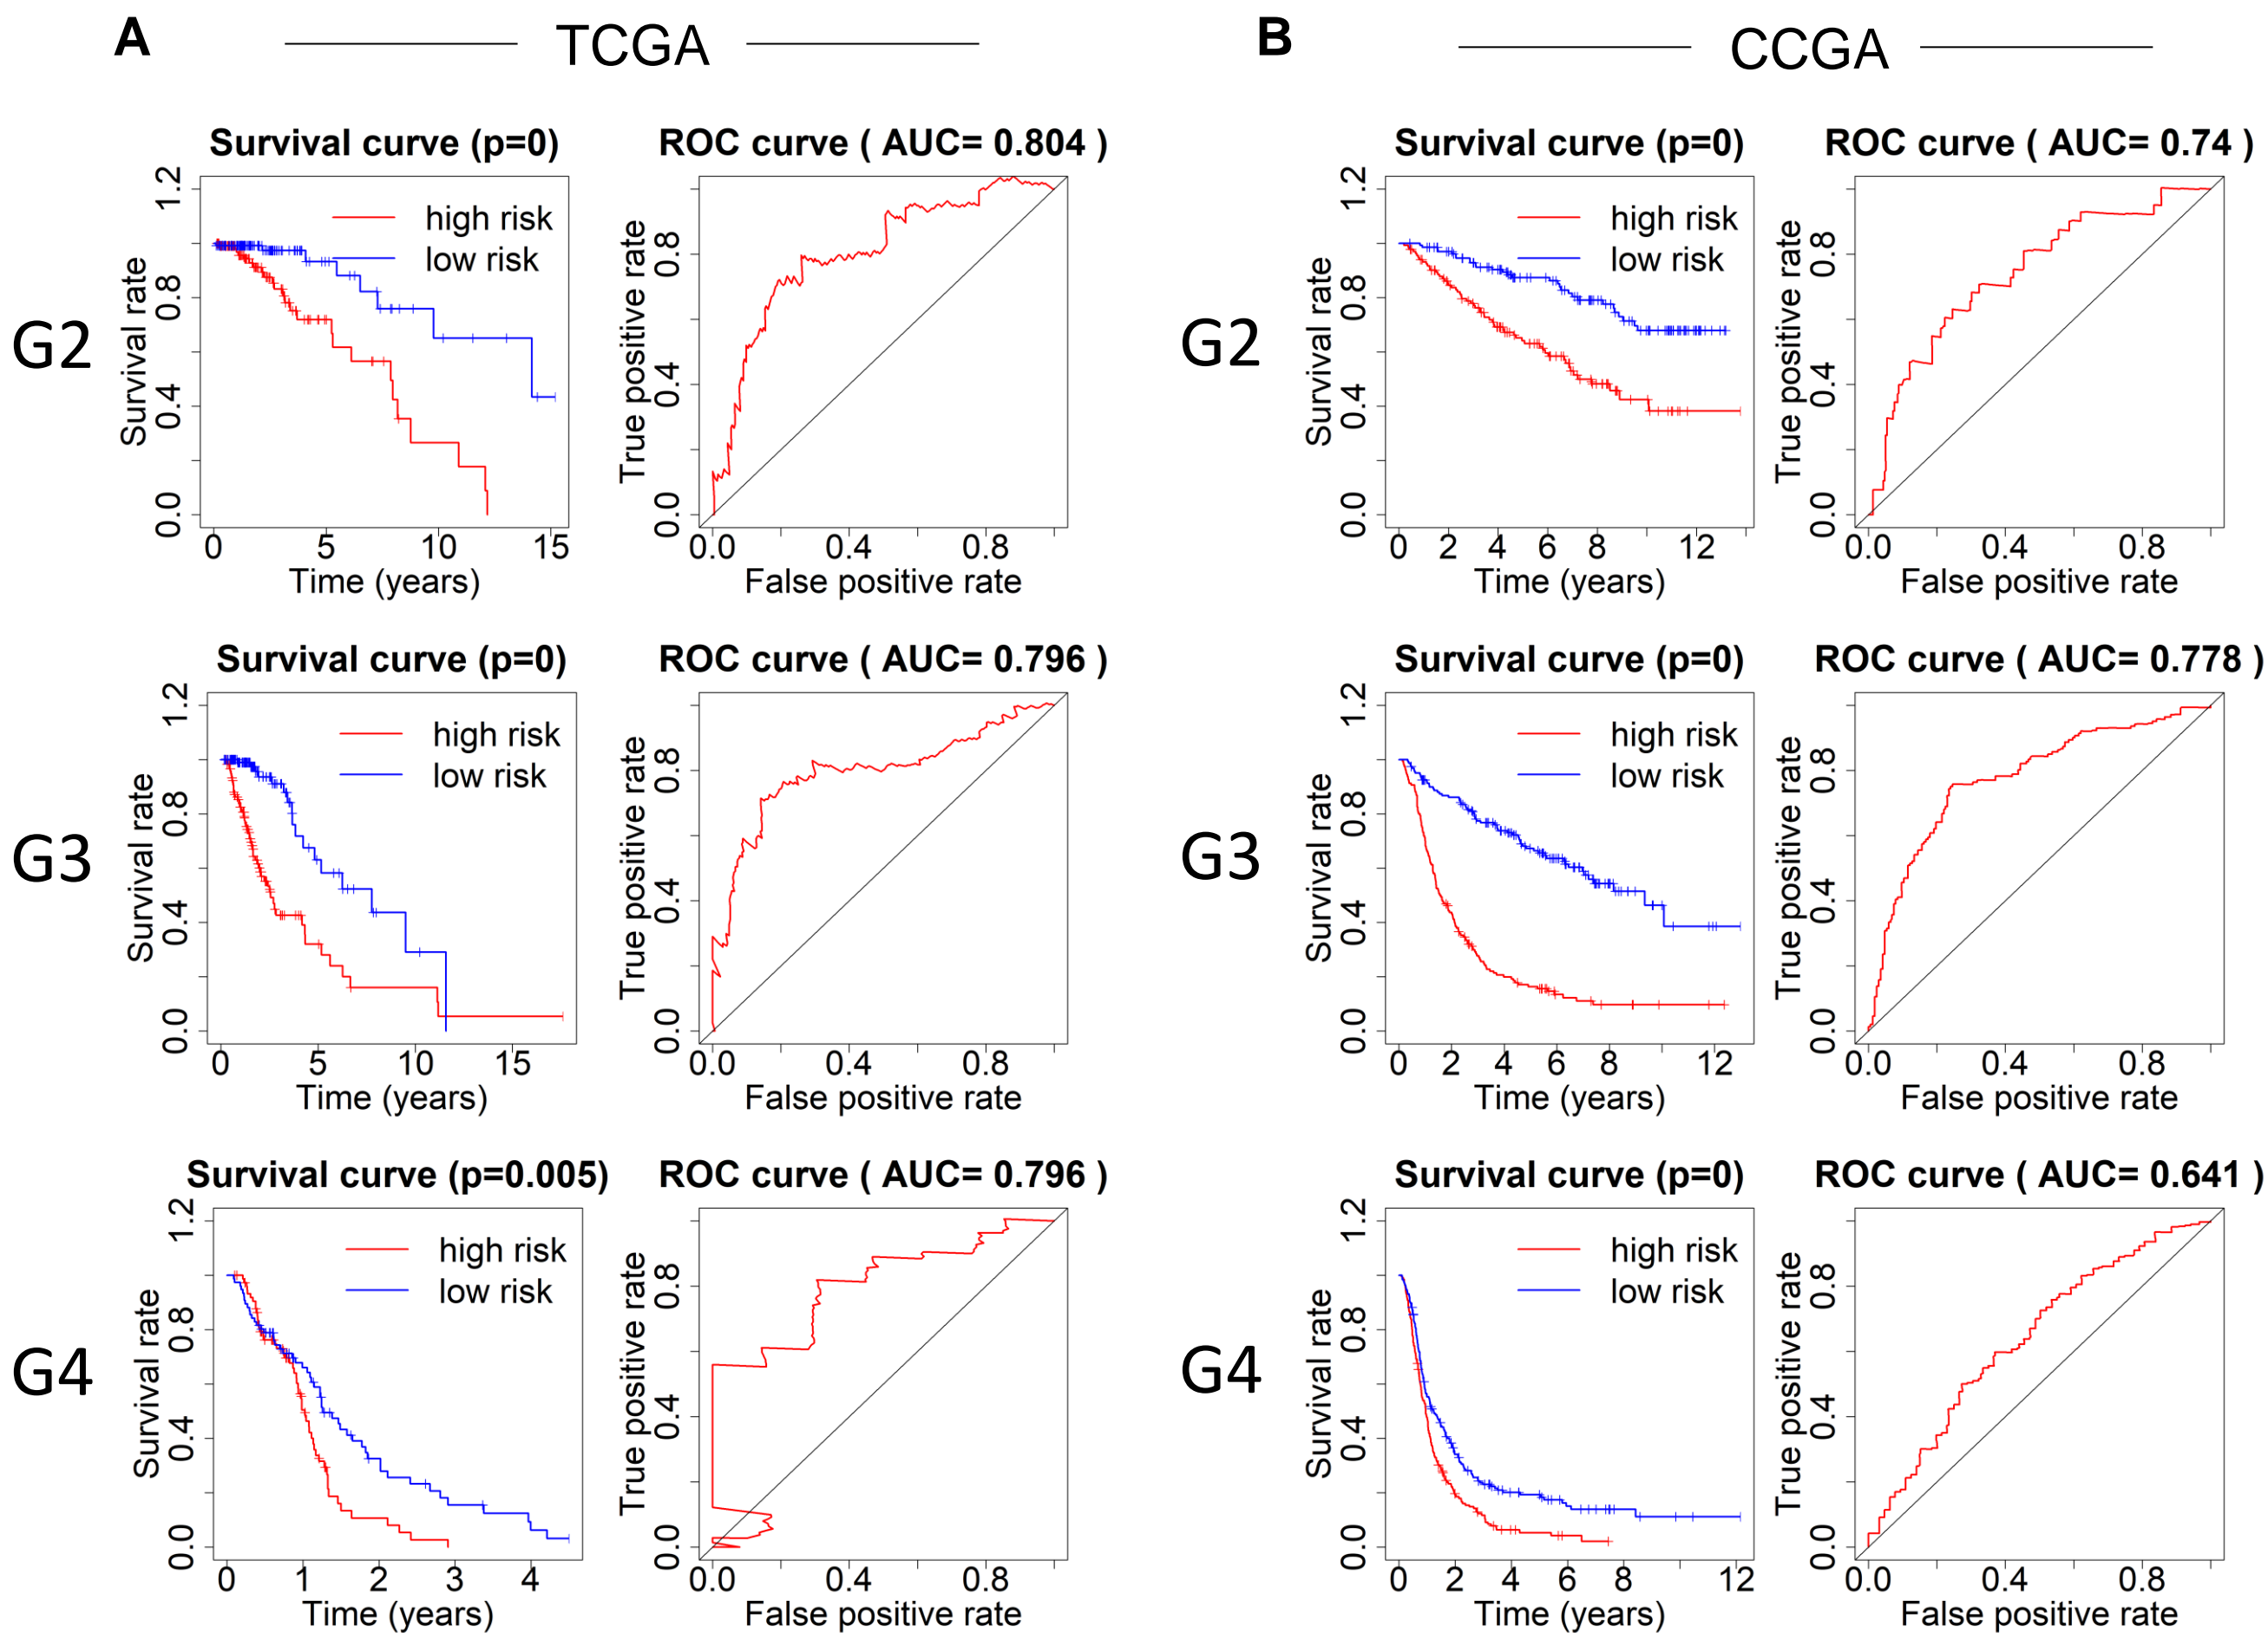

Figure S1 (A) ROC analysis of each grade of glioma in TCGA showed similar AUC values in G2~G4. (B) ROC analysis of each grade of glioma in CCGA showed similar AUC values in G2 and G3.
